# Supplementary material for: Prediction of Potential Suitable Areas and Priority Protection for Cupressus gigantea on the Tibetan Plateau
Source: MDPI journal article supplement (doi:10.3390/plants13060896), 2024-03-20
Supplement: s1 [file s1]

Supplementary Information

# Prediction of Potential Suitable Areas and Priority Protection for *Cupressus gigantea* on the Tibetan Plateau

Huayong Zhang <sup>1,2,\*</sup>, Yanan Wei <sup>1</sup>, Junjie Yue <sup>1</sup>, Zhongyu Wang <sup>1</sup>, Hengchao Zou <sup>1</sup>, Xiande Ji <sup>3</sup>, Shijia Zhang <sup>4</sup> and Zhao Liu <sup>2</sup>

<sup>1</sup> Research Center for Engineering Ecology and Nonlinear Science, North China Electric Power University, Beijing 102206, China; zouhc@ncepu.edu.cn (H.Z.)

<sup>2</sup> Theoretical Ecology and Engineering Ecology Research Group, School of Life Sciences, Shandong University, Qingdao 250100, China

<sup>3</sup> Energy Conversion Group, Energy and Sustainability Research Institute Groningen, Faculty of Science and Engineering, University of Groningen, Nijenborgh 6, 9747AG Groningen, The Netherlands

<sup>4</sup> Research Group WILD Department Biology, Vrije Universiteit Brussel, Pleinlaan 2, 1050 Brussels, Belgium

\* Correspondence: zhanghuayong@sdu.edu.cn

**This word file includes**

Figure and Table Legends

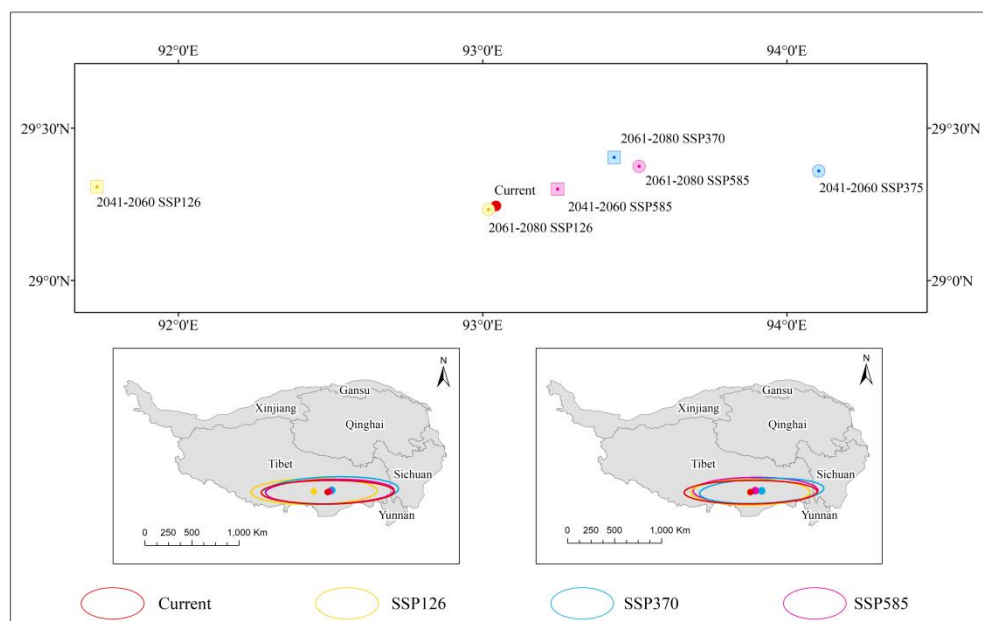

**Figure S1.** The centroid and standard deviation ellipses of highly suitable areas.

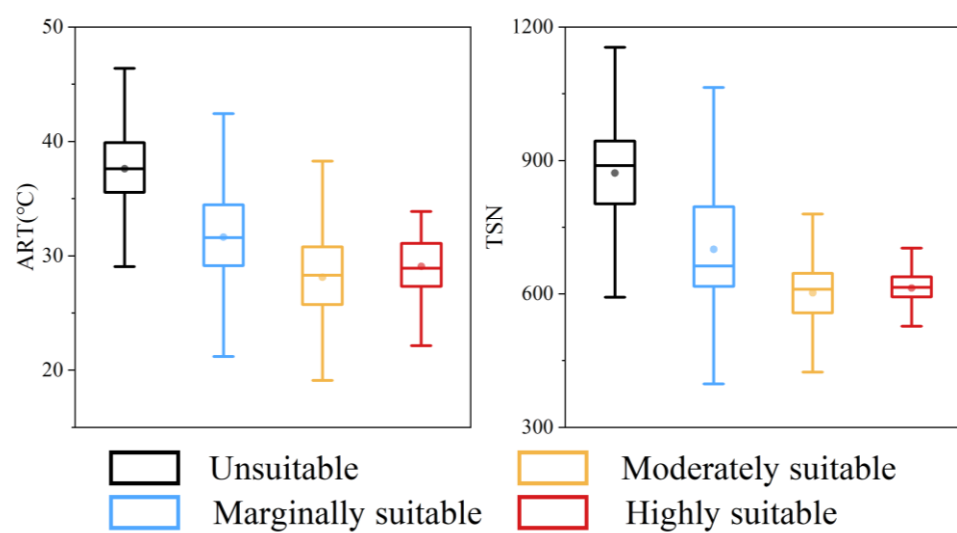

**Figure S2.** Distribution of TSN and ART in different potential suitable areas.

**Table S1.** All variables and their abbreviations used in our study.

| Groups         | Abbreviations | Environmental variables                          | Source<br>[resolution]              |
|----------------|---------------|--------------------------------------------------|-------------------------------------|
| Temperature    | MAT           | Annual mean temperature                          | WorldClim<br>version 2.1<br>[0.25°] |
|                | MDR           | Mean diurnal range                               |                                     |
|                | Iso           | Isothermality                                    |                                     |
|                | Tmax          | Max temperature of warmest month                 |                                     |
|                | Tmin          | Min temperature of coldest month                 |                                     |
|                | MTWEQ         | Mean temperature of wettest quarter              |                                     |
|                | MTDQ          | Mean temperature of driest quarter               |                                     |
|                | MTWQ          | Mean temperature of warmest quarter              |                                     |
|                | MTCQ          | Mean temperature of coldest quarter              |                                     |
|                | TSN           | Temperature seasonality                          |                                     |
|                | ART           | Temperature annual range                         |                                     |
| Precipitation  | MAP           | Annual precipitation                             | WorldClim<br>version 2.1<br>[0.25°] |
|                | PWM           | Precipitation of wettest month                   |                                     |
|                | PDM           | Precipitation of driest month                    |                                     |
|                | PWQ           | Precipitation of wettest quarter                 |                                     |
|                | PDQ           | Precipitation of driest quarter                  |                                     |
|                | PWAQ          | Precipitation of warmest quarter                 |                                     |
|                | PCOQ          | Precipitation of coldest quarter                 |                                     |
|                | PSN           | Precipitation seasonality                        |                                     |
| Soil texture   | BDOD          | Bulk density (kg/m <sup>3</sup> )                | SoilGrids<br>2.0[250m]              |
|                | CLAY          | Clay content (%)                                 |                                     |
|                | CFVO          | Coarse fragments volumetric (%)                  |                                     |
|                | SILT          | Silt content (%)                                 |                                     |
|                | SAND          | Sand content (%)                                 |                                     |
| Soil fertility | CEC           | Cation exchange capacity (cmolc/kg)              | SoilGrids<br>2.0[250m]              |
|                | OCD           | Soil organic carbon density (kg/m <sup>3</sup> ) |                                     |
|                | OCS           | Soil organic carbon stock                        |                                     |
|                | SOC           | Soil organic carbon content (g/kg)               |                                     |
|                | PHH2O         | Soil pH x 10 in H2O                              |                                     |
| Terrain        | NITROGEN      | Total nitrogen (g/kg)                            | WorldClim<br>version 2.1<br>[0.25°] |
|                | ELE           | Elevation(m)                                     |                                     |
